# Supplementary material for: Bypassing stroke-damaged neural pathways via a neural interface induces targeted cortical adaptation
Source: PubMed Central journal article supplement (PMC6796004; doi:10.1038/s41467-019-12647-y), 2019-10-16
Supplement: 41467_2019_12647_MOESM3_ESM.pdf [file 41467_2019_12647_MOESM3_ESM.pdf]

## Reporting Summary

Nature Research wishes to improve the reproducibility of the work that we publish. This form provides structure for consistency and transparency in reporting. For further information on Nature Research policies, see [Authors & Referees](#) and the [Editorial Policy Checklist](#).

### Statistics

For all statistical analyses, confirm that the following items are present in the figure legend, table legend, main text, or Methods section.

n/a Confirmed

- The exact sample size ( $n$ ) for each experimental group/condition, given as a discrete number and unit of measurement
- A statement on whether measurements were taken from distinct samples or whether the same sample was measured repeatedly
- The statistical test(s) used AND whether they are one- or two-sided  
*Only common tests should be described solely by name; describe more complex techniques in the Methods section.*
- A description of all covariates tested
- A description of any assumptions or corrections, such as tests of normality and adjustment for multiple comparisons
- A full description of the statistical parameters including central tendency (e.g. means) or other basic estimates (e.g. regression coefficient) AND variation (e.g. standard deviation) or associated estimates of uncertainty (e.g. confidence intervals)
- For null hypothesis testing, the test statistic (e.g.  $F$ ,  $t$ ,  $r$ ) with confidence intervals, effect sizes, degrees of freedom and  $P$  value noted  
*Give  $P$  values as exact values whenever suitable.*
- For Bayesian analysis, information on the choice of priors and Markov chain Monte Carlo settings
- For hierarchical and complex designs, identification of the appropriate level for tests and full reporting of outcomes
- Estimates of effect sizes (e.g. Cohen's  $d$ , Pearson's  $r$ ), indicating how they were calculated

*Our web collection on [statistics for biologists](#) contains articles on many of the points above.*

### Software and code

Policy information about [availability of computer code](#)

Data collection

ECoG signals in monkey TE and M were recorded with a Cerebus™ data acquisition system (Blackrock Microsystems, Salt Lake City, UT, USA). Local field potential signals in monkey TA were recorded with a CED 1401 data acquisition system (CED, Cambridge, UK).

Data analysis

We performed Data analysis using custom software written in MATLAB (The MathWorks Inc., MA, USA). Statistical analysis were performed using MATLAB statistical tool box.

For manuscripts utilizing custom algorithms or software that are central to the research but not yet described in published literature, software must be made available to editors/reviewers. We strongly encourage code deposition in a community repository (e.g. GitHub). See the Nature Research [guidelines for submitting code & software](#) for further information.

### Data

Policy information about [availability of data](#)

All manuscripts must include a [data availability statement](#). This statement should provide the following information, where applicable:

- Accession codes, unique identifiers, or web links for publicly available datasets
- A list of figures that have associated raw data
- A description of any restrictions on data availability

Data supporting the findings of this study are available from the corresponding authors upon reasonable request.

### Field-specific reporting

Please select the one below that is the best fit for your research. If you are not sure, read the appropriate sections before making your selection.

- Life sciences       Behavioural & social sciences       Ecological, evolutionary & environmental sciences

## Life sciences study design

All studies must disclose on these points even when the disclosure is negative.

|                 |                                                                                                                                                                                                                         |
|-----------------|-------------------------------------------------------------------------------------------------------------------------------------------------------------------------------------------------------------------------|
| Sample size     | No statistical methods were used for predetermining sample size. We used a sample size that is comparable to previously published studies in the field.                                                                 |
| Data exclusions | Neither data nor animals were excluded.                                                                                                                                                                                 |
| Replication     | All of three monkeys with subcortical stroke performed behavioral task. Experiments were repeated using 92 different pairs of cortical sites and muscles. Main findings were highly reproducible as you see in results. |
| Randomization   | The experiments were not randomized. Because of all of three monkeys displayed hemiparalysis due to subcortical stroke, the experimenter could detect that the monkeys are stroke monkeys.                              |
| Blinding        | Blinding was not used. Because of all of three monkeys displayed hemiparalysis due to subcortical stroke, the experimenter could detect that the monkeys are stroke monkeys.                                            |

## Reporting for specific materials, systems and methods

We require information from authors about some types of materials, experimental systems and methods used in many studies. Here, indicate whether each material, system or method listed is relevant to your study. If you are not sure if a list item applies to your research, read the appropriate section before selecting a response.

### Materials & experimental systems

### Methods

| n/a                                 | Involved in the study                                           | n/a                                 | Involved in the study                                      |
|-------------------------------------|-----------------------------------------------------------------|-------------------------------------|------------------------------------------------------------|
| <input checked="" type="checkbox"/> | <input type="checkbox"/> Antibodies                             | <input checked="" type="checkbox"/> | <input type="checkbox"/> ChIP-seq                          |
| <input checked="" type="checkbox"/> | <input type="checkbox"/> Eukaryotic cell lines                  | <input checked="" type="checkbox"/> | <input type="checkbox"/> Flow cytometry                    |
| <input checked="" type="checkbox"/> | <input type="checkbox"/> Palaeontology                          | <input type="checkbox"/>            | <input checked="" type="checkbox"/> MRI-based neuroimaging |
| <input type="checkbox"/>            | <input checked="" type="checkbox"/> Animals and other organisms |                                     |                                                            |
| <input checked="" type="checkbox"/> | <input type="checkbox"/> Human research participants            |                                     |                                                            |
| <input checked="" type="checkbox"/> | <input type="checkbox"/> Clinical data                          |                                     |                                                            |

## Animals and other organisms

Policy information about [studies involving animals](#); [ARRIVE guidelines](#) recommended for reporting animal research

|                         |                                                                                                                                                                                                                                                                                                                                                       |
|-------------------------|-------------------------------------------------------------------------------------------------------------------------------------------------------------------------------------------------------------------------------------------------------------------------------------------------------------------------------------------------------|
| Laboratory animals      | The experiments were performed using 3 male macaque monkeys.<br>2 Macaca fuscata: Monkey M, 9.0 kg and Monkey TA, 7.5 kg; 1 Macaca mulatta; Monkey TE, 9.8 kg                                                                                                                                                                                         |
| Wild animals            | N.A.                                                                                                                                                                                                                                                                                                                                                  |
| Field-collected samples | N.A.                                                                                                                                                                                                                                                                                                                                                  |
| Ethics oversight        | All experimental procedures were performed in accordance with the guidelines of the National Institutes of Health and the Ministry of Education, Culture, Sports, Science, and Technology (MEXT) of Japan, and were approved by the Institutional Animal Care and Use Committee of the National Institutes of Natural Sciences (Approval No. 14A125). |

Note that full information on the approval of the study protocol must also be provided in the manuscript.

## Magnetic resonance imaging

### Experimental design

|                                 |                                                                 |
|---------------------------------|-----------------------------------------------------------------|
| Design type                     | Structural MRI under deep anaesthesia                           |
| Design specifications           | Scan time: 5 min scan, number of block: 4, number of average: 4 |
| Behavioral performance measures | N.A.                                                            |

## Acquisition

|                               |                                                                                                                                                          |
|-------------------------------|----------------------------------------------------------------------------------------------------------------------------------------------------------|
| Imaging type(s)               | Structural                                                                                                                                               |
| Field strength                | 3 tesla                                                                                                                                                  |
| Sequence & imaging parameters | T2-weighted MRI was performed using a two-dimensional turbo spine echo sequence (0.5 × 0.5 mm, 40 slices, slice thickness = 1.0 mm, TR/TE = 7880/19 ms). |
| Area of acquisition           | A whole brain scan                                                                                                                                       |
| Diffusion MRI                 | <input type="checkbox"/> Used <input checked="" type="checkbox"/> Not used                                                                               |

## Preprocessing

|                            |      |
|----------------------------|------|
| Preprocessing software     | N.A. |
| Normalization              | N.A. |
| Normalization template     | N.A. |
| Noise and artifact removal | N.A. |
| Volume censoring           | N.A. |

## Statistical modeling & inference

|                                                                           |                                                                                                                  |
|---------------------------------------------------------------------------|------------------------------------------------------------------------------------------------------------------|
| Model type and settings                                                   | N.A.                                                                                                             |
| Effect(s) tested                                                          | N.A.                                                                                                             |
| Specify type of analysis:                                                 | <input checked="" type="checkbox"/> Whole brain <input type="checkbox"/> ROI-based <input type="checkbox"/> Both |
| Statistic type for inference<br>(See <a href="#">Eklund et al. 2016</a> ) | N.A.                                                                                                             |
| Correction                                                                | N.A.                                                                                                             |

## Models & analysis

|                                     |                                                                       |
|-------------------------------------|-----------------------------------------------------------------------|
| n/a                                 | Involvement in the study                                              |
| <input checked="" type="checkbox"/> | <input type="checkbox"/> Functional and/or effective connectivity     |
| <input checked="" type="checkbox"/> | <input type="checkbox"/> Graph analysis                               |
| <input checked="" type="checkbox"/> | <input type="checkbox"/> Multivariate modeling or predictive analysis |
